# Supplementary material for: Quantitative extraction and high precision isotope measurements of nickel by MC-ICPMS
Source: Royal Society of Chemistry journal article supplement (doi:10.1039/b607569j), 2006-01-01
Supplement: b607569j.pdf [file b607569j.pdf]

**Supporting on-line material:**

| Sample              | $\varepsilon(^{60}\text{Ni}/^{58}\text{Ni}) \pm 2\text{SD}$ | Sample   | $\varepsilon(^{60}\text{Ni}/^{58}\text{Ni}) \pm 2\text{SD}$ |
|---------------------|-------------------------------------------------------------|----------|-------------------------------------------------------------|
| Chupaderos          | -0.29±0.16                                                  | Carbo 1  | -0.22±0.19                                                  |
|                     | -0.12±0.20                                                  | Carbo 2  | -0.13±0.21                                                  |
|                     | -0.23±0.21                                                  | Carbo 3  | -0.18±0.14                                                  |
|                     | -0.28±0.23                                                  | Carbo 4  | -0.01±0.15                                                  |
|                     | -0.25±0.17                                                  |          |                                                             |
| Gressk              | -0.22±0.11                                                  | Gibeon 1 | -0.09±0.10                                                  |
|                     | -0.28±0.12                                                  | Gibeon 2 | -0.13±0.11                                                  |
|                     | -0.24±0.13                                                  |          |                                                             |
| Nelson County       | -0.31±0.13                                                  | Watson 1 | -0.12±0.17                                                  |
|                     | -0.25±0.18                                                  | Watson 2 | -0.05±0.11                                                  |
|                     | -0.13±0.19                                                  |          |                                                             |
| North Chile Sulfide | -0.28±0.15                                                  |          |                                                             |
|                     | -2.48±0.09                                                  |          |                                                             |
| Seeslägen           | -2.58±0.10                                                  |          |                                                             |
|                     | -0.12±0.11                                                  |          |                                                             |
| Tawallah Valley     | -0.19±0.12                                                  |          |                                                             |
|                     | -0.09±0.11                                                  |          |                                                             |
|                     | -0.07±0.13                                                  |          |                                                             |
|                     | -0.04±0.16                                                  |          |                                                             |
|                     | -0.03±0.17                                                  |          |                                                             |

**Table 4:** Reproducibility for iron meteorites.

Data for replicate measurements of the same sample solution are presented in the left data column. The data column to the right summarizes results obtained on different fragments from the same meteorite processed separately.
